# Supplementary material for: Multiparametric MRI Evaluation of Oropharyngeal Squamous Cell Carcinoma. A Mono-Institutional Study
Source: MDPI journal article supplement (doi:10.3390/jcm10173865), 2021-08-28
Supplement: s1 [file s1]

## Supplementary Tables

**Supplementary Table S1** ADC and  $D_t$  coefficients in primary tumors (PTs) and metastatic lymph nodes (LNs) by the tumor subsite.

| Tonsil |        |           | Base of the tongue |           | Mann-Whitney test |
|--------|--------|-----------|--------------------|-----------|-------------------|
| PT     | Median | IQR       | Median             | IQR       | P value           |
| ADC    | 1.19   | 1.04-1.39 | 1.44               | 1.28-1.61 | <b>0.001</b>      |
| $D_t$  | 0.92   | 0.78-1.04 | 1.13               | 0.99-1.26 | <b>&lt;0.001</b>  |
| LN     | Median | IQR       | Median             | IQR       | P value           |
| ADC    | 1.12   | 0.94-1.32 | 1.18               | 1.03-1.35 | 0.274             |
| $D_t$  | 0.92   | 0.79-1.09 | 0.99               | 0.82-1.22 | 0.243             |

**Supplementary Table S2** ADC and  $D_t$  coefficients in primary tumors (PTs) sorted by the HPV status, in Tonsil and Base of the tongue subgroups, separately.

| HPV-negative       |       |        |           | HPV-positive |           | Mann-Whitney test |
|--------------------|-------|--------|-----------|--------------|-----------|-------------------|
| Tonsil             | PT    | Median | IQR       | Median       | IQR       | P value           |
|                    | ADC   | 1.33   | 0.95-2.02 | 1.16         | 1.03-1.33 | 0.185             |
|                    | $D_t$ | 1.06   | 0.79-1.36 | 0.90         | 0.78-1.01 | 0.163*            |
| Base of the tongue | PT    | Median | IQR       | Median       | IQR       | P value           |
|                    | ADC   | 1.46   | 1.32-1.64 | 1.42         | 1.19-1.61 | 0.346*            |
|                    | $D_t$ | 1.18   | 1.03-1.36 | 1.03         | 0.91-1.23 | <b>0.051</b>      |

\*Student T test

**Supplementary Table S3** Comparison between imaging parameters of HPV-negative, HPV-positive non-smoker non-alcoholic patients, and HPV-positive smoker and alcoholic patients, for primary tumors (PTs) and lymph-nodes (LNs)

| Parameter                                              | <i>HPV-negative</i> | <i>HPV-positive<br/>nonsmokers<br/>non-alcoholic</i> | <i>HPV-positive<br/>smokers<br/>alcoholic</i> | <i>P value</i> |
|--------------------------------------------------------|---------------------|------------------------------------------------------|-----------------------------------------------|----------------|
| <i>PT</i>                                              | <b>(n=28)</b>       | <b>(n=24)</b>                                        | <b>(n=38)</b>                                 |                |
| <b>ADC(10<sup>-3</sup> mm<sup>2</sup>/s)</b>           | 1.45<br>(1.32-1.6)  | 1.33<br>(1.15-1.45)                                  | 1.20<br>(1.07-1.34)                           | <b>0.016</b>   |
| <b>D<sub>t</sub>(10<sup>-3</sup> mm<sup>2</sup>/s)</b> | 1.16<br>(1.03-1.3)  | 0.96<br>(0.87-1.03)                                  | 0.93<br>(0.84-1.04)                           | <b>0.005</b>   |
| <i>LN</i>                                              | <b>(n=25)</b>       | <b>(n=23)</b>                                        | <b>(n=40)</b>                                 |                |
| <b>ADC(10<sup>-3</sup> mm<sup>2</sup>/s)</b>           | 1.33<br>(1.02-1.48) | 1.13<br>(1.03-1.25)                                  | 1.08<br>(0.93-1.23)                           | 0.055          |
| <b>D<sub>t</sub>(10<sup>-3</sup> mm<sup>2</sup>/s)</b> | 1.11<br>(0.96-1.30) | 0.93<br>(0.79-1.08)                                  | 0.90<br>(0.78-0.99)                           | <b>0.018</b>   |

Median values (95% confidence interval). P values refer to Kruskal-Wallis test. Statistically significant p-values are **bold**. Abbreviations: ADC, apparent diffusion coefficient; D<sub>t</sub>, tissue diffusion coefficient.

**Supplementary Table S4** Results of Spearman's correlation tests between ADC/D<sub>t</sub> and volume size of primary tumor (PT) and lymph node (LN)

|           | <i>ADC</i>                    |                | <i>D<sub>t</sub></i>         |                |
|-----------|-------------------------------|----------------|------------------------------|----------------|
|           | <i>Spearman's Rho (95%CI)</i> | <i>p-value</i> | <i>Spearman's Rho(95%CI)</i> | <i>p-value</i> |
| PT volume | -0.005 (-0.212,0.202)         | 0.963          | 0.111 (-0.100,0.312)         | 0.298          |
| LN volume | 0.189 (-0.022,0.383)          | 0.078          | 0.203 (-0.007,0.395)         | 0.059          |

**Supplementary Table S5** ADC and D<sub>t</sub> coefficients in lymph nodes (LNs) with and without extra-capsular spread (ECS)

|                      | <b>with ECS</b> |              |  | <b>no ECS</b> |              |                |
|----------------------|-----------------|--------------|--|---------------|--------------|----------------|
| <b>LN</b>            | <i>Median</i>   | <i>95%CI</i> |  | <i>Median</i> | <i>95%CI</i> | <i>P value</i> |
| <i>ADC</i>           | 1.17            | (1.07,1.25)  |  | 1.09          | (1.02,1.21)  | 0.333          |
| <i>D<sub>t</sub></i> | 0.95            | (0.88,1.06)  |  | 0.90          | (0.80,1.05)  | 0.168          |

Abbreviation: 95%CI, 95% confidence interval. P values refer to Mann-Whitney test.
